# Supplementary material for: Dietary Catalase Supplementation Alleviates Deoxynivalenol-Induced Oxidative Stress and Gut Microbiota Dysbiosis in Broiler Chickens
Source: MDPI journal article supplement (doi:10.3390/toxins14120830), 2022-11-28
Supplement: s1 [file s1]

# Supplementary Material: Dietary Catalase Supplementation Alleviates Deoxynivalenol-Induced Oxidative Stress and Gut Microbiota Dysbiosis in Broiler Chickens

Weiwei Wang, Jingqiang Zhu, Qingyun Cao, Changming Zhang, Zemin Dong, Dingyuan Feng, Hui Ye \* and Jianjun Zuo

**Table S1.** Composition of the basal diet (air-dry basis)

| Ingredients                  | Content (%) |
|------------------------------|-------------|
| Corn                         | 54.70       |
| Soybean meal                 | 38.10       |
| Soybean oil                  | 2.60        |
| Limestone                    | 1.20        |
| Dicalcium phosphate          | 2.00        |
| Sodium chloride              | 0.26        |
| Lysine                       | 0.01        |
| DL-Methionine (98%)          | 0.13        |
| Premix <sup>1</sup>          | 1.00        |
| Total                        | 100.00      |
| Nutrient levels              |             |
| Metabolizable energy (MJ/kg) | 12.55       |
| Crude protein (%)            | 21.10       |
| Calcium (%)                  | 1.00        |
| Available phosphorus (%)     | 0.46        |
| Lysine (%)                   | 1.2         |
| Methionine (%)               | 0.5         |

<sup>1</sup>Supplied per kilogram of diet: vitamin A, 5,000 IU; thiamin, 2.5 mg; riboflavin, 15 mg; pyridoxine, 4 mg; vitamin D, 80.75 mg; tocopherol, 31 mg; menadione, 1.6 mg; pantothenic acid, 60 mg; niacin, 15 mg; biotin, 0.5 mg; folic acid, 1.5 mg; choline, 450 mg; Cu, 9.5 mg; Zn, 60 mg; Fe, 70 mg; Mn, 121 mg; Se, 0.45 mg; I, 1.4 mg.

**Table S2.** The contents of some mycotoxins aside from deoxynivalenol and its acetylated precursors in feed

| Items        | Content             |
|--------------|---------------------|
| Zearalenone  | 0.13 mg/kg          |
| Aflatoxin B1 | Less than 0.2 µg/kg |
| Fumonisin    | 1.85 mg/kg          |

A. Shannon index

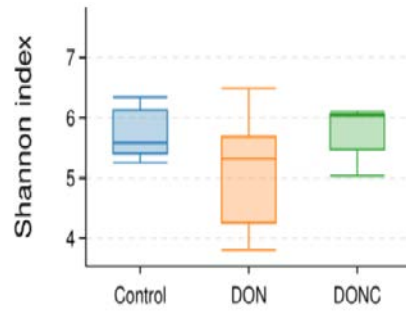

B. Simpson index

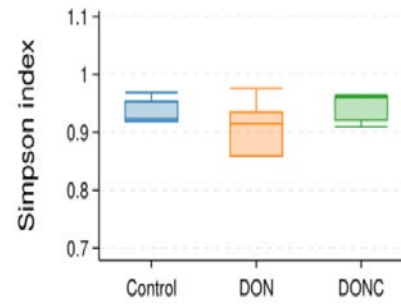

C. Chao1 index

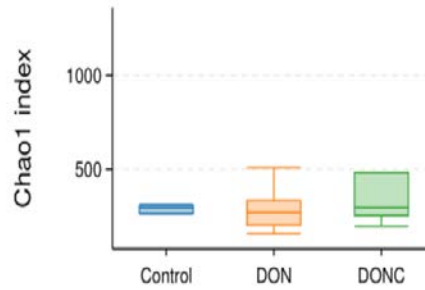

D. ACE index

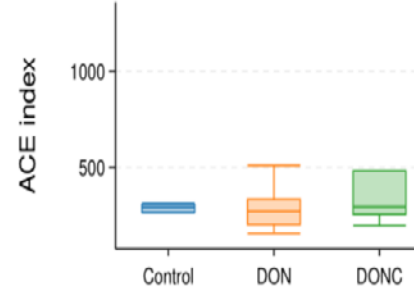

**Figure S1.** Alpha-diversity analysis of gut microbiota among groups. (A) Shannon index; (B) Simpson index; (C) Chao1 index; (D) ACE index. Control, birds were fed a basal diet; DON, birds were fed a basal diet contaminated with DON; DONC, birds were fed a DON-contaminated basal diet supplemented with 200 U/kg CAT.

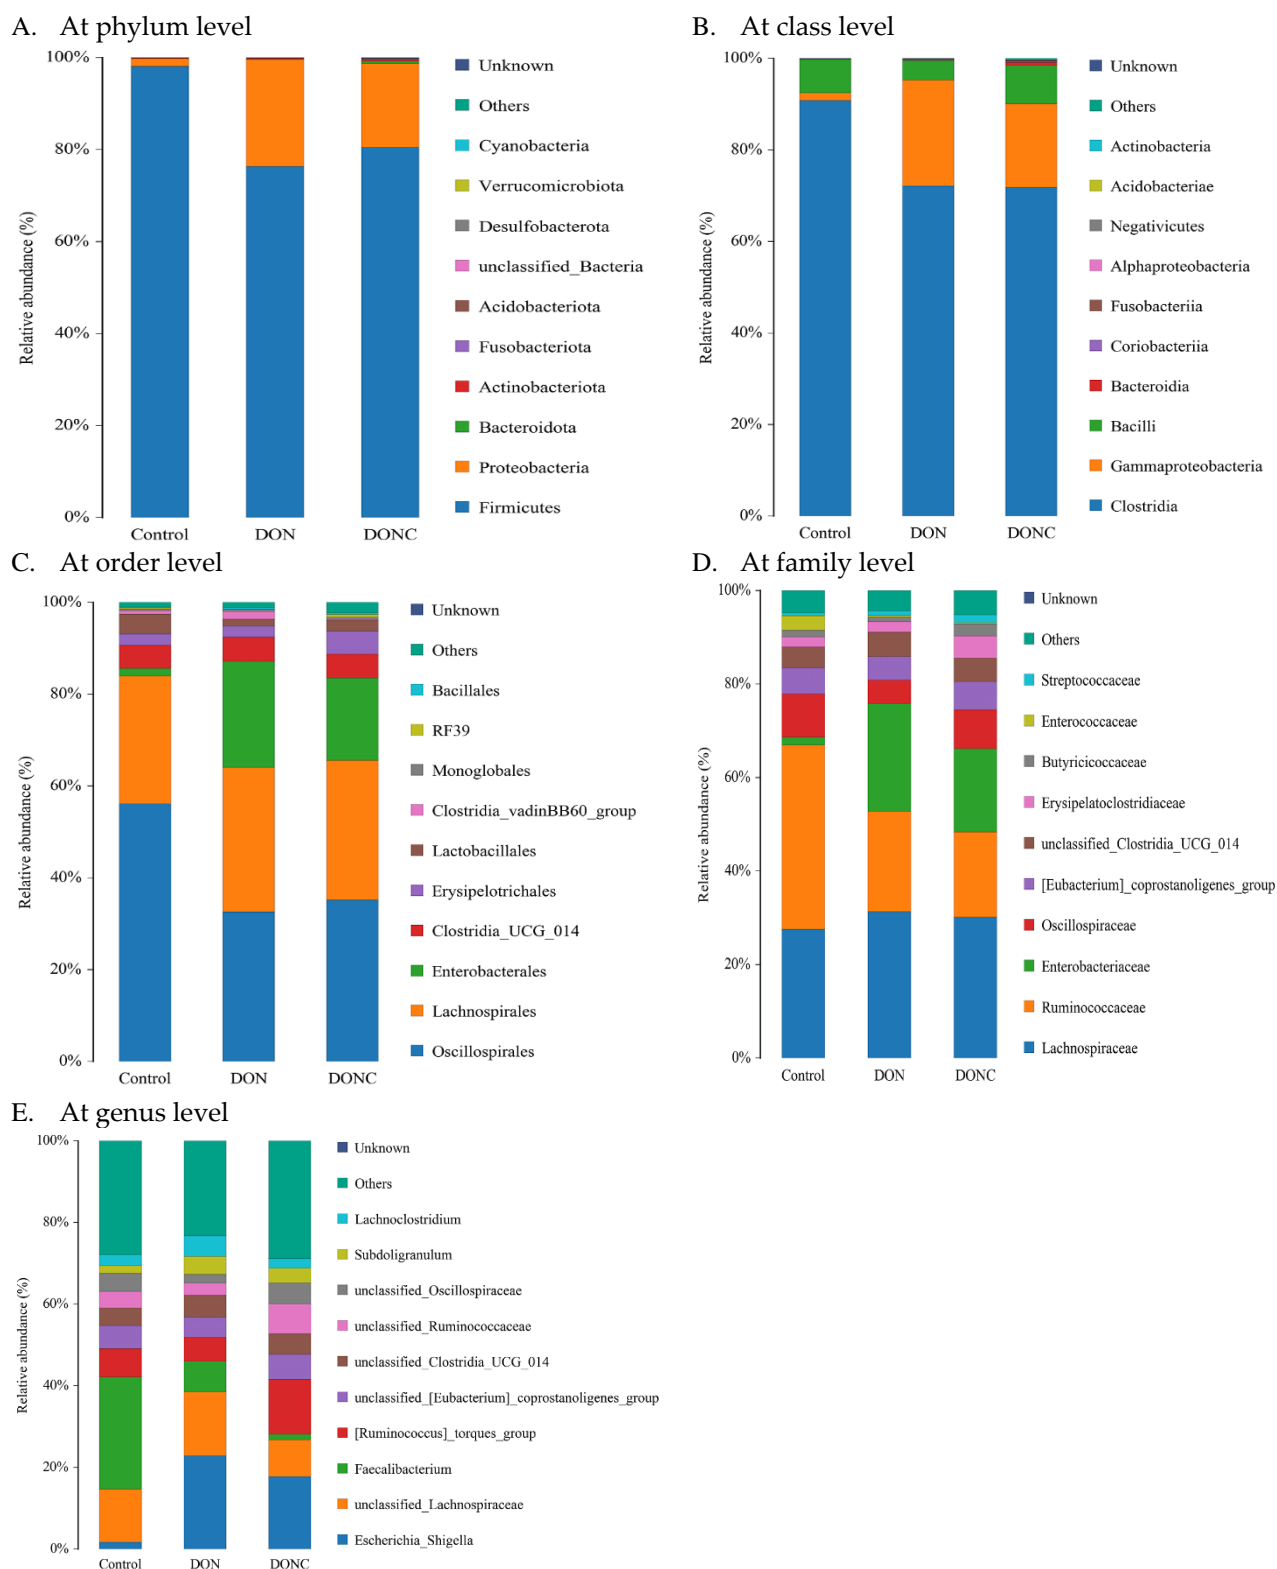

**Figure S2.** Gut microbial composition of broilers at phylum (A), class (B), order (C), family (D) and genus (E) levels. Control, birds were fed a basal diet; DON, birds were fed a basal diet contaminated with DON; DONC, birds were fed a DON-contaminated basal diet supplemented with 200 U/kg CAT.

A. At phylum level

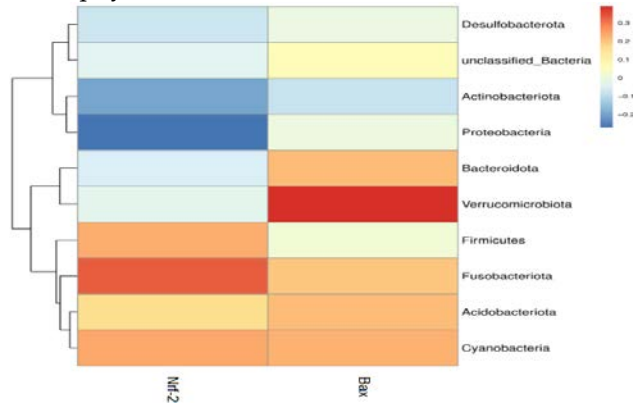

B. At class level

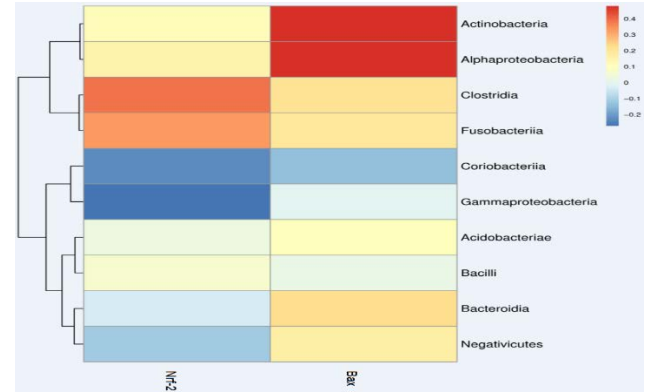

C. At order level

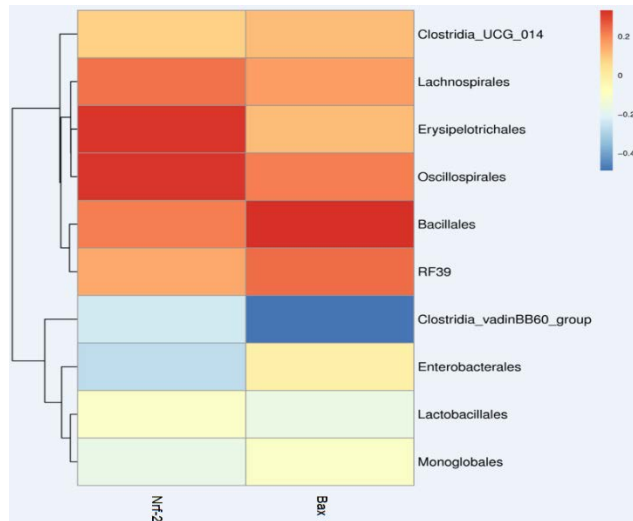

D. At family level

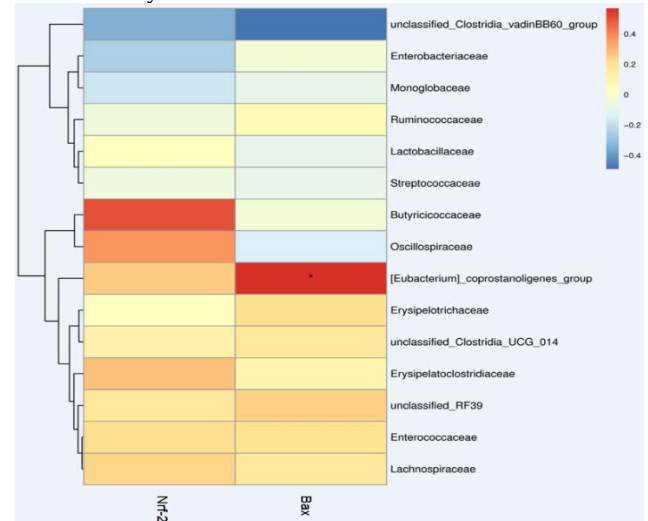

E. At genus level

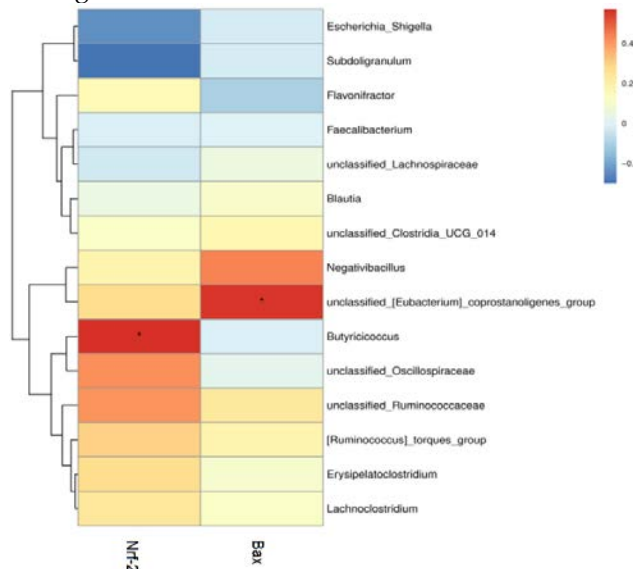

**Figure S3.** Correlation analysis between gut microbiota (A, at phylum level; B, at class level; C, at order level; D, at family level; E, at genus level) and intestinal gene expression in broilers. Bax, Bcl-2 associated X protein; Nrf2, nuclear factor erythroid-2 related factor. The red and blue panes represent positive and negative correlations, respectively. Color intensity means the Spearman's r-value of correlations in each panel. The asterisks indicate significant correlations ( $*p < 0.05$ ). Control, birds were fed a basal diet; DON, birds were fed a basal diet contaminated with DON; DONC, birds were fed a DON-contaminated basal diet supplemented with 200 U/kg CAT.
